# Supplementary material for: Radiocarbon Measurements of Ecosystem Respiration and Soil Pore-Space CO 2 in Utqiaġvik (Barrow), Alaska
Source: Copernicus journal article supplement (doi:10.5194/essd-2018-29), 2018-04-19
Supplement: Supplementary file 1 [file essd-2018-29-supplement.pdf]

## Constructing an annually resolved time series of atmospheric $\Delta^{14}\text{C}$ -CO<sub>2</sub> for Barrow, Alaska

### Datasets used

1. The IntCal13 dataset provides pre-bomb radiocarbon values at 5-year resolution until 1950 (Reimer et al., 2013).
2. Radiocarbon measurements made in Fruholmen, Norway cover the period from December 1962 through June 1993 (Nydal and Lövseth, 1996). Limited measurements from Point Barrow between 1985 and 1991 confirm that this dataset provides a close approximation for Barrow, Alaska values (Meijer et al., 2008).
3. Radiocarbon measurements made in Point Barrow between June 1999 through December 2007 were published in Graven *et al.*, (Graven et al., 2012).
4. On August 12, 2012, July 13, 2013, September 2, 2014 and September 7, 2014, we collected air samples from the Barrow Environmental Observatory in 3 L evacuated stainless steel canisters. CO<sub>2</sub> was extracted from air samples and analyzed for radiocarbon according to the methods described in the main text.

### Data selection and gap filling

Due to large-scale circulation patterns and ecosystem carbon exchange, atmospheric radiocarbon values vary seasonally by ~10‰ in Barrow, peaking in late winter (Graven et al., 2012). Because CO<sub>2</sub> fixation occurs primarily in summer, summertime radiocarbon values best represent atmospheric inputs for turnover time modeling. For each year with available radiocarbon data, we calculated an annual summertime average using measurements from July and August, the months of maximum CO<sub>2</sub> uptake in Barrow (Dennis et al., 1978; Zona et al., 2014). Because July/August data were unavailable for 2014, we used the average of the measurements made on September 2 and 7. From the IntCal13 dataset, annually resolved data were interpolated using a smoothing spline with 1 degree of freedom (R version 3.3.3 “Another Canoe,” 2017-03-06).

With these annualized datasets, no data were available for the following years: 1951-1962, 1992-2000, and 2008-2011. For each of the latter two gaps, we predicted missing data from an exponential model using up to 10 years of annualized data preceding or following the gap. The first model ( $R^2 = 0.9976$ ) included data from 1983-2010, and the second model ( $R^2 = 0.9658$ ) covered the years 1999-2014. The gap between 1951 and 1962 spanned the period of rapid atmospheric radiocarbon increase from nuclear weapons testing. For this period, we used a constant  $\Delta^{14}\text{C}$  value of -24.5 ‰ from 1951 through 1957, followed by a linear increase from 1958 through 1962.

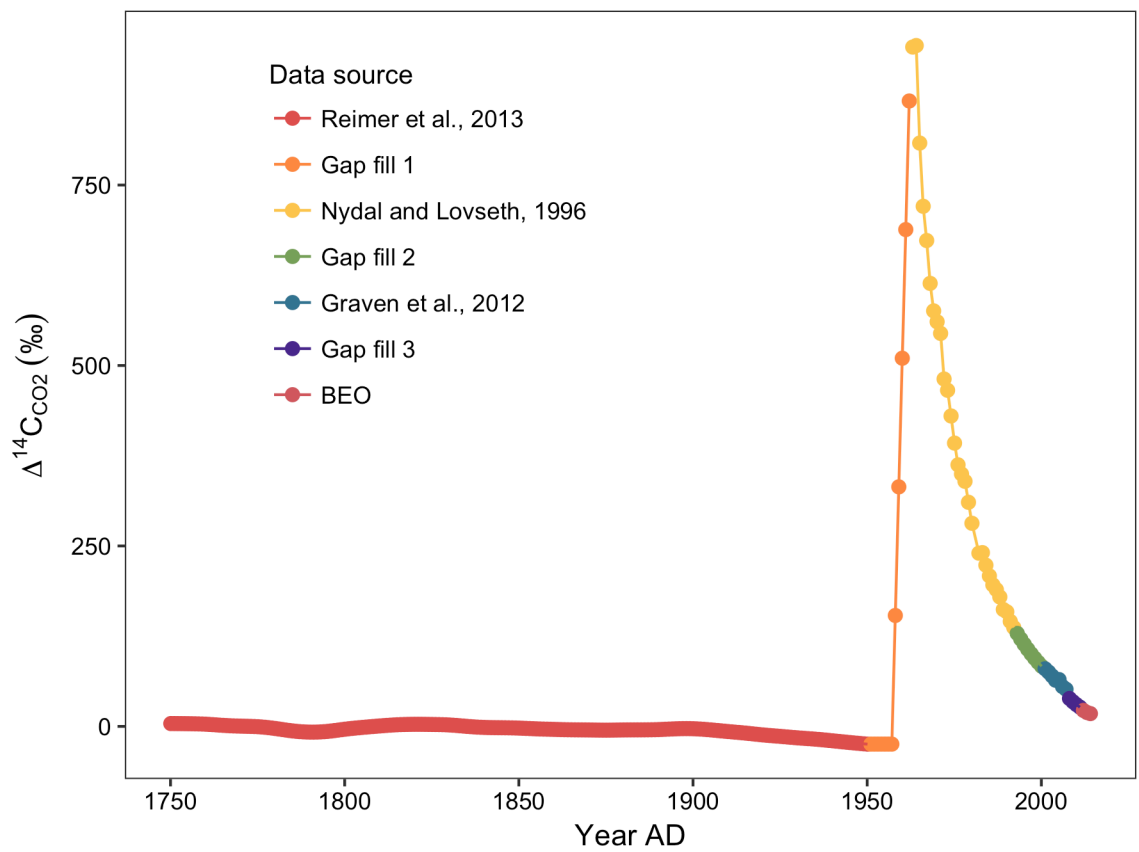

**Figure S1. Compiled time series of atmospheric  $\Delta^{14}\text{C}$  in Barrow, Alaska. Points represent summertime averages based on recent measurements (BEO), published values, and interpolated estimates.**

**Table S1****Compiled time series of atmospheric  $\Delta^{14}\text{C-CO}_2$  in Barrow, Alaska**

| Data source                 | Year | $\Delta^{14}\text{C-CO}_2$ (‰) |
|-----------------------------|------|--------------------------------|
| Reimer <i>et al.</i> , 2013 | 1750 | 4.0                            |
| Reimer <i>et al.</i> , 2013 | 1751 | 3.9                            |
| Reimer <i>et al.</i> , 2013 | 1752 | 3.9                            |
| Reimer <i>et al.</i> , 2013 | 1753 | 3.9                            |
| Reimer <i>et al.</i> , 2013 | 1754 | 3.8                            |
| Reimer <i>et al.</i> , 2013 | 1755 | 3.8                            |
| Reimer <i>et al.</i> , 2013 | 1756 | 3.7                            |
| Reimer <i>et al.</i> , 2013 | 1757 | 3.6                            |
| Reimer <i>et al.</i> , 2013 | 1758 | 3.5                            |
| Reimer <i>et al.</i> , 2013 | 1759 | 3.3                            |
| Reimer <i>et al.</i> , 2013 | 1760 | 3.1                            |
| Reimer <i>et al.</i> , 2013 | 1761 | 2.8                            |
| Reimer <i>et al.</i> , 2013 | 1762 | 2.5                            |
| Reimer <i>et al.</i> , 2013 | 1763 | 2.1                            |
| Reimer <i>et al.</i> , 2013 | 1764 | 1.8                            |
| Reimer <i>et al.</i> , 2013 | 1765 | 1.5                            |
| Reimer <i>et al.</i> , 2013 | 1766 | 1.2                            |
| Reimer <i>et al.</i> , 2013 | 1767 | 0.9                            |
| Reimer <i>et al.</i> , 2013 | 1768 | 0.7                            |
| Reimer <i>et al.</i> , 2013 | 1769 | 0.5                            |
| Reimer <i>et al.</i> , 2013 | 1770 | 0.4                            |
| Reimer <i>et al.</i> , 2013 | 1771 | 0.3                            |
| Reimer <i>et al.</i> , 2013 | 1772 | 0.2                            |
| Reimer <i>et al.</i> , 2013 | 1773 | 0.0                            |
| Reimer <i>et al.</i> , 2013 | 1774 | -0.2                           |
| Reimer <i>et al.</i> , 2013 | 1775 | -0.4                           |
| Reimer <i>et al.</i> , 2013 | 1776 | -0.7                           |
| Reimer <i>et al.</i> , 2013 | 1777 | -1.2                           |
| Reimer <i>et al.</i> , 2013 | 1778 | -1.7                           |
| Reimer <i>et al.</i> , 2013 | 1779 | -2.3                           |
| Reimer <i>et al.</i> , 2013 | 1780 | -2.9                           |
| Reimer <i>et al.</i> , 2013 | 1781 | -3.6                           |
| Reimer <i>et al.</i> , 2013 | 1782 | -4.3                           |
| Reimer <i>et al.</i> , 2013 | 1783 | -5.0                           |
| Reimer <i>et al.</i> , 2013 | 1784 | -5.7                           |
| Reimer <i>et al.</i> , 2013 | 1785 | -6.3                           |
| Reimer <i>et al.</i> , 2013 | 1786 | -6.8                           |
| Reimer <i>et al.</i> , 2013 | 1787 | -7.2                           |
| Reimer <i>et al.</i> , 2013 | 1788 | -7.5                           |

(table continues)

| Data source                 | Year | $\Delta^{14}\text{C-CO}_2$ (‰) |
|-----------------------------|------|--------------------------------|
| Reimer <i>et al.</i> , 2013 | 1789 | -7.8                           |
| Reimer <i>et al.</i> , 2013 | 1790 | -7.9                           |
| Reimer <i>et al.</i> , 2013 | 1791 | -7.9                           |
| Reimer <i>et al.</i> , 2013 | 1792 | -7.8                           |
| Reimer <i>et al.</i> , 2013 | 1793 | -7.6                           |
| Reimer <i>et al.</i> , 2013 | 1794 | -7.3                           |
| Reimer <i>et al.</i> , 2013 | 1795 | -6.9                           |
| Reimer <i>et al.</i> , 2013 | 1796 | -6.4                           |
| Reimer <i>et al.</i> , 2013 | 1797 | -5.8                           |
| Reimer <i>et al.</i> , 2013 | 1798 | -5.1                           |
| Reimer <i>et al.</i> , 2013 | 1799 | -4.5                           |
| Reimer <i>et al.</i> , 2013 | 1800 | -3.9                           |
| Reimer <i>et al.</i> , 2013 | 1801 | -3.3                           |
| Reimer <i>et al.</i> , 2013 | 1802 | -2.8                           |
| Reimer <i>et al.</i> , 2013 | 1803 | -2.3                           |
| Reimer <i>et al.</i> , 2013 | 1804 | -1.8                           |
| Reimer <i>et al.</i> , 2013 | 1805 | -1.4                           |
| Reimer <i>et al.</i> , 2013 | 1806 | -1.0                           |
| Reimer <i>et al.</i> , 2013 | 1807 | -0.5                           |
| Reimer <i>et al.</i> , 2013 | 1808 | -0.1                           |
| Reimer <i>et al.</i> , 2013 | 1809 | 0.3                            |
| Reimer <i>et al.</i> , 2013 | 1810 | 0.7                            |
| Reimer <i>et al.</i> , 2013 | 1811 | 1.0                            |
| Reimer <i>et al.</i> , 2013 | 1812 | 1.4                            |
| Reimer <i>et al.</i> , 2013 | 1813 | 1.7                            |
| Reimer <i>et al.</i> , 2013 | 1814 | 2.0                            |
| Reimer <i>et al.</i> , 2013 | 1815 | 2.3                            |
| Reimer <i>et al.</i> , 2013 | 1816 | 2.5                            |
| Reimer <i>et al.</i> , 2013 | 1817 | 2.7                            |
| Reimer <i>et al.</i> , 2013 | 1818 | 2.8                            |
| Reimer <i>et al.</i> , 2013 | 1819 | 2.9                            |
| Reimer <i>et al.</i> , 2013 | 1820 | 2.9                            |
| Reimer <i>et al.</i> , 2013 | 1821 | 2.9                            |
| Reimer <i>et al.</i> , 2013 | 1822 | 2.9                            |
| Reimer <i>et al.</i> , 2013 | 1823 | 2.9                            |
| Reimer <i>et al.</i> , 2013 | 1824 | 2.8                            |
| Reimer <i>et al.</i> , 2013 | 1825 | 2.7                            |
| Reimer <i>et al.</i> , 2013 | 1826 | 2.6                            |
| Reimer <i>et al.</i> , 2013 | 1827 | 2.5                            |
| Reimer <i>et al.</i> , 2013 | 1828 | 2.4                            |
| Reimer <i>et al.</i> , 2013 | 1829 | 2.2                            |
| Reimer <i>et al.</i> , 2013 | 1830 | 2.0                            |
| Reimer <i>et al.</i> , 2013 | 1831 | 1.7                            |

(table continues)

| Data source                 | Year | $\Delta^{14}\text{C-CO}_2$ (‰) |
|-----------------------------|------|--------------------------------|
| Reimer <i>et al.</i> , 2013 | 1832 | 1.3                            |
| Reimer <i>et al.</i> , 2013 | 1833 | 0.9                            |
| Reimer <i>et al.</i> , 2013 | 1834 | 0.5                            |
| Reimer <i>et al.</i> , 2013 | 1835 | 0.1                            |
| Reimer <i>et al.</i> , 2013 | 1836 | -0.3                           |
| Reimer <i>et al.</i> , 2013 | 1837 | -0.7                           |
| Reimer <i>et al.</i> , 2013 | 1838 | -1.0                           |
| Reimer <i>et al.</i> , 2013 | 1839 | -1.2                           |
| Reimer <i>et al.</i> , 2013 | 1840 | -1.4                           |
| Reimer <i>et al.</i> , 2013 | 1841 | -1.6                           |
| Reimer <i>et al.</i> , 2013 | 1842 | -1.6                           |
| Reimer <i>et al.</i> , 2013 | 1843 | -1.7                           |
| Reimer <i>et al.</i> , 2013 | 1844 | -1.7                           |
| Reimer <i>et al.</i> , 2013 | 1845 | -1.8                           |
| Reimer <i>et al.</i> , 2013 | 1846 | -1.9                           |
| Reimer <i>et al.</i> , 2013 | 1847 | -1.9                           |
| Reimer <i>et al.</i> , 2013 | 1848 | -2.1                           |
| Reimer <i>et al.</i> , 2013 | 1849 | -2.2                           |
| Reimer <i>et al.</i> , 2013 | 1850 | -2.4                           |
| Reimer <i>et al.</i> , 2013 | 1851 | -2.5                           |
| Reimer <i>et al.</i> , 2013 | 1852 | -2.8                           |
| Reimer <i>et al.</i> , 2013 | 1853 | -3.0                           |
| Reimer <i>et al.</i> , 2013 | 1854 | -3.2                           |
| Reimer <i>et al.</i> , 2013 | 1855 | -3.4                           |
| Reimer <i>et al.</i> , 2013 | 1856 | -3.6                           |
| Reimer <i>et al.</i> , 2013 | 1857 | -3.7                           |
| Reimer <i>et al.</i> , 2013 | 1858 | -3.9                           |
| Reimer <i>et al.</i> , 2013 | 1859 | -4.0                           |
| Reimer <i>et al.</i> , 2013 | 1860 | -4.1                           |
| Reimer <i>et al.</i> , 2013 | 1861 | -4.3                           |
| Reimer <i>et al.</i> , 2013 | 1862 | -4.4                           |
| Reimer <i>et al.</i> , 2013 | 1863 | -4.5                           |
| Reimer <i>et al.</i> , 2013 | 1864 | -4.6                           |
| Reimer <i>et al.</i> , 2013 | 1865 | -4.7                           |
| Reimer <i>et al.</i> , 2013 | 1866 | -4.8                           |
| Reimer <i>et al.</i> , 2013 | 1867 | -4.8                           |
| Reimer <i>et al.</i> , 2013 | 1868 | -4.8                           |
| Reimer <i>et al.</i> , 2013 | 1869 | -4.9                           |
| Reimer <i>et al.</i> , 2013 | 1870 | -4.9                           |
| Reimer <i>et al.</i> , 2013 | 1871 | -5.0                           |
| Reimer <i>et al.</i> , 2013 | 1872 | -5.1                           |
| Reimer <i>et al.</i> , 2013 | 1873 | -5.1                           |
| Reimer <i>et al.</i> , 2013 | 1874 | -5.2                           |

(table continues)

| Data source                 | Year | $\Delta^{14}\text{C-CO}_2$ (‰) |
|-----------------------------|------|--------------------------------|
| Reimer <i>et al.</i> , 2013 | 1875 | -5.2                           |
| Reimer <i>et al.</i> , 2013 | 1876 | -5.2                           |
| Reimer <i>et al.</i> , 2013 | 1877 | -5.1                           |
| Reimer <i>et al.</i> , 2013 | 1878 | -5.0                           |
| Reimer <i>et al.</i> , 2013 | 1879 | -5.0                           |
| Reimer <i>et al.</i> , 2013 | 1880 | -4.9                           |
| Reimer <i>et al.</i> , 2013 | 1881 | -4.9                           |
| Reimer <i>et al.</i> , 2013 | 1882 | -4.8                           |
| Reimer <i>et al.</i> , 2013 | 1883 | -4.8                           |
| Reimer <i>et al.</i> , 2013 | 1884 | -4.8                           |
| Reimer <i>et al.</i> , 2013 | 1885 | -4.8                           |
| Reimer <i>et al.</i> , 2013 | 1886 | -4.8                           |
| Reimer <i>et al.</i> , 2013 | 1887 | -4.7                           |
| Reimer <i>et al.</i> , 2013 | 1888 | -4.6                           |
| Reimer <i>et al.</i> , 2013 | 1889 | -4.5                           |
| Reimer <i>et al.</i> , 2013 | 1890 | -4.4                           |
| Reimer <i>et al.</i> , 2013 | 1891 | -4.2                           |
| Reimer <i>et al.</i> , 2013 | 1892 | -4.0                           |
| Reimer <i>et al.</i> , 2013 | 1893 | -3.7                           |
| Reimer <i>et al.</i> , 2013 | 1894 | -3.5                           |
| Reimer <i>et al.</i> , 2013 | 1895 | -3.3                           |
| Reimer <i>et al.</i> , 2013 | 1896 | -3.2                           |
| Reimer <i>et al.</i> , 2013 | 1897 | -3.1                           |
| Reimer <i>et al.</i> , 2013 | 1898 | -3.1                           |
| Reimer <i>et al.</i> , 2013 | 1899 | -3.1                           |
| Reimer <i>et al.</i> , 2013 | 1900 | -3.2                           |
| Reimer <i>et al.</i> , 2013 | 1901 | -3.4                           |
| Reimer <i>et al.</i> , 2013 | 1902 | -3.7                           |
| Reimer <i>et al.</i> , 2013 | 1903 | -4.0                           |
| Reimer <i>et al.</i> , 2013 | 1904 | -4.4                           |
| Reimer <i>et al.</i> , 2013 | 1905 | -4.8                           |
| Reimer <i>et al.</i> , 2013 | 1906 | -5.3                           |
| Reimer <i>et al.</i> , 2013 | 1907 | -5.7                           |
| Reimer <i>et al.</i> , 2013 | 1908 | -6.2                           |
| Reimer <i>et al.</i> , 2013 | 1909 | -6.6                           |
| Reimer <i>et al.</i> , 2013 | 1910 | -7.1                           |
| Reimer <i>et al.</i> , 2013 | 1911 | -7.5                           |
| Reimer <i>et al.</i> , 2013 | 1912 | -7.9                           |
| Reimer <i>et al.</i> , 2013 | 1913 | -8.4                           |
| Reimer <i>et al.</i> , 2013 | 1914 | -8.8                           |
| Reimer <i>et al.</i> , 2013 | 1915 | -9.3                           |
| Reimer <i>et al.</i> , 2013 | 1916 | -9.8                           |
| Reimer <i>et al.</i> , 2013 | 1917 | -10.3                          |

(table continues)

| Data source                 | Year | $\Delta^{14}\text{C-CO}_2$ (‰) |
|-----------------------------|------|--------------------------------|
| Reimer <i>et al.</i> , 2013 | 1918 | -10.8                          |
| Reimer <i>et al.</i> , 2013 | 1919 | -11.3                          |
| Reimer <i>et al.</i> , 2013 | 1920 | -11.8                          |
| Reimer <i>et al.</i> , 2013 | 1921 | -12.2                          |
| Reimer <i>et al.</i> , 2013 | 1922 | -12.6                          |
| Reimer <i>et al.</i> , 2013 | 1923 | -13.0                          |
| Reimer <i>et al.</i> , 2013 | 1924 | -13.4                          |
| Reimer <i>et al.</i> , 2013 | 1925 | -13.8                          |
| Reimer <i>et al.</i> , 2013 | 1926 | -14.2                          |
| Reimer <i>et al.</i> , 2013 | 1927 | -14.6                          |
| Reimer <i>et al.</i> , 2013 | 1928 | -15.1                          |
| Reimer <i>et al.</i> , 2013 | 1929 | -15.5                          |
| Reimer <i>et al.</i> , 2013 | 1930 | -15.9                          |
| Reimer <i>et al.</i> , 2013 | 1931 | -16.2                          |
| Reimer <i>et al.</i> , 2013 | 1932 | -16.6                          |
| Reimer <i>et al.</i> , 2013 | 1933 | -16.9                          |
| Reimer <i>et al.</i> , 2013 | 1934 | -17.3                          |
| Reimer <i>et al.</i> , 2013 | 1935 | -17.6                          |
| Reimer <i>et al.</i> , 2013 | 1936 | -18.0                          |
| Reimer <i>et al.</i> , 2013 | 1937 | -18.5                          |
| Reimer <i>et al.</i> , 2013 | 1938 | -19.0                          |
| Reimer <i>et al.</i> , 2013 | 1939 | -19.4                          |
| Reimer <i>et al.</i> , 2013 | 1940 | -19.9                          |
| Reimer <i>et al.</i> , 2013 | 1941 | -20.4                          |
| Reimer <i>et al.</i> , 2013 | 1942 | -20.9                          |
| Reimer <i>et al.</i> , 2013 | 1943 | -21.4                          |
| Reimer <i>et al.</i> , 2013 | 1944 | -21.9                          |
| Reimer <i>et al.</i> , 2013 | 1945 | -22.4                          |
| Reimer <i>et al.</i> , 2013 | 1946 | -22.8                          |
| Reimer <i>et al.</i> , 2013 | 1947 | -23.3                          |
| Reimer <i>et al.</i> , 2013 | 1948 | -23.7                          |
| Reimer <i>et al.</i> , 2013 | 1949 | -24.1                          |
| Reimer <i>et al.</i> , 2013 | 1950 | -24.6                          |
| Gap fill 1                  | 1951 | -24.5                          |
| Gap fill 1                  | 1952 | -24.5                          |
| Gap fill 1                  | 1953 | -24.5                          |
| Gap fill 1                  | 1954 | -24.5                          |
| Gap fill 1                  | 1955 | -24.5                          |
| Gap fill 1                  | 1956 | -24.5                          |
| Gap fill 1                  | 1957 | -24.5                          |
| Gap fill 1                  | 1958 | 153.7                          |
| Gap fill 1                  | 1959 | 331.9                          |
| Gap fill 1                  | 1960 | 510.1                          |

(table continues)

| Data source                 | Year | $\Delta^{14}\text{C-CO}_2$ (‰) |
|-----------------------------|------|--------------------------------|
| Gap fill 1                  | 1961 | 688.3                          |
| Gap fill 1                  | 1962 | 866.5                          |
| Nydal & Lövseth, 1996       | 1963 | 941.2                          |
| Nydal & Lövseth, 1996       | 1964 | 943.3                          |
| Nydal & Lövseth, 1996       | 1965 | 808.2                          |
| Nydal & Lövseth, 1996       | 1966 | 720.6                          |
| Nydal & Lövseth, 1996       | 1967 | 673.2                          |
| Nydal & Lövseth, 1996       | 1968 | 613.8                          |
| Nydal & Lövseth, 1996       | 1969 | 575.7                          |
| Nydal & Lövseth, 1996       | 1970 | 560.6                          |
| Nydal & Lövseth, 1996       | 1971 | 544.5                          |
| Nydal & Lövseth, 1996       | 1972 | 481.3                          |
| Nydal & Lövseth, 1996       | 1973 | 465.7                          |
| Nydal & Lövseth, 1996       | 1974 | 430.1                          |
| Nydal & Lövseth, 1996       | 1975 | 392.5                          |
| Nydal & Lövseth, 1996       | 1976 | 362.4                          |
| Nydal & Lövseth, 1996       | 1977 | 349.7                          |
| Nydal & Lövseth, 1996       | 1978 | 339.6                          |
| Nydal & Lövseth, 1996       | 1979 | 310.5                          |
| Nydal & Lövseth, 1996       | 1980 | 281.4                          |
| Nydal & Lövseth, 1996       | 1982 | 240.0                          |
| Nydal & Lövseth, 1996       | 1983 | 240.8                          |
| Nydal & Lövseth, 1996       | 1984 | 223.4                          |
| Nydal & Lövseth, 1996       | 1985 | 208.5                          |
| Nydal & Lövseth, 1996       | 1986 | 196.1                          |
| Nydal & Lövseth, 1996       | 1987 | 189.5                          |
| Nydal & Lövseth, 1996       | 1988 | 179.4                          |
| Nydal & Lövseth, 1996       | 1989 | 162.0                          |
| Nydal & Lövseth, 1996       | 1990 | 158.8                          |
| Nydal & Lövseth, 1996       | 1991 | 145.6                          |
| Nydal & Lövseth, 1996       | 1992 | 137.0                          |
| Gap fill 2                  | 1993 | 128.9                          |
| Gap fill 2                  | 1994 | 121.1                          |
| Gap fill 2                  | 1995 | 113.8                          |
| Gap fill 2                  | 1996 | 106.9                          |
| Gap fill 2                  | 1997 | 100.5                          |
| Gap fill 2                  | 1998 | 94.4                           |
| Gap fill 2                  | 1999 | 88.7                           |
| Gap fill 2                  | 2000 | 83.4                           |
| Graven <i>et al.</i> , 2012 | 2001 | 79.8                           |
| Graven <i>et al.</i> , 2012 | 2002 | 75.3                           |
| Graven <i>et al.</i> , 2012 | 2003 | 70.0                           |
| Graven <i>et al.</i> , 2012 | 2004 | 64.0                           |

(table continues)



| Data source                      | Year | $\Delta^{14}\text{C-CO}_2$ (‰) |
|----------------------------------|------|--------------------------------|
| Graven <i>et al.</i> , 2012      | 2005 | 64.9                           |
| Graven <i>et al.</i> , 2012      | 2006 | 55.2                           |
| Graven <i>et al.</i> , 2012      | 2007 | 51.5                           |
| Gap fill 3                       | 2008 | 38.7                           |
| Gap fill 3                       | 2009 | 34.2                           |
| Gap fill 3                       | 2010 | 30.2                           |
| Gap fill 3                       | 2011 | 26.6                           |
| Barrow Environmental Observatory | 2012 | 22.2                           |
| Barrow Environmental Observatory | 2013 | 19.3                           |
| Barrow Environmental Observatory | 2014 | 17.8                           |

Note:  $\Delta^{14}\text{C-CO}_2$  values represent mean summertime atmospheric radiocarbon in Barrow, Alaska, based on recent measurements (Barrow Environmental Observatory), published values, and interpolated estimates.

## References

- Dennis, J. G., Tieszen, L. L. and Vetter, M. A.: Seasonal Dynamics of Above- and Belowground Production of Vascular Plants at Barrow, Alaska, in *Vegetation and Production Ecology of an Alaskan Arctic Tundra*, edited by L. L. Tieszen, pp. 113–140, Springer New York., 1978.
- Graven, H. D., Guilderson, T. P. and Keeling, R. F.: Observations of radiocarbon in CO<sub>2</sub> at seven global sampling sites in the Scripps flask network: Analysis of spatial gradients and seasonal cycles, *J. Geophys. Res. Atmospheres*, 117(D2) [online] Available from: <http://onlinelibrary.wiley.com/doi/10.1029/2011JD016535/full> (Accessed 24 May 2017), 2012.
- Meijer, H. J., Pertuisot, M. H. and Plicht, J. van der: HIGH-ACCURACY <sup>14</sup>C MEASUREMENTS FOR ATMOSPHERIC CO<sub>2</sub> SAMPLES BY AMS, *Radiocarbon*, 48(3), 355–372, 2008.
- Nydal, R. and Lövseth, K.: Carbon-14 measurements in atmospheric CO<sub>2</sub> from northern and southern hemisphere sites, 1962-1993, Oak Ridge National Lab., TN (United States); Oak Ridge Inst. for Science and Education, TN (United States). [online] Available from: <http://www.osti.gov/scitech/biblio/461185> (Accessed 24 May 2017), 1996.
- Reimer, P. J., Bard, E., Bayliss, A., Beck, J. W., Blackwell, P. G., Ramsey, C. B., Buck, C. E., Cheng, H., Edwards, R. L., Friedrich, M., Grootes, P. M., Guilderson, T. P., Haflidason, H., Hajdas, I., Hatté, C., Heaton, T. J., Hoffmann, D. L., Hogg, A. G., Hughen, K. A., Kaiser, K. F., Kromer, B., Manning, S. W., Niu, M., Reimer, R. W., Richards, D. A., Scott, E. M., Southon, J. R., Staff, R. A., Turney, C. S. M. and Plicht, J. van der: IntCal13 and Marine13 Radiocarbon Age Calibration Curves 0–50,000 Years cal BP, *Radiocarbon*, 55(4), 1869–1887, doi:10.2458/azu\_js\_rc.55.16947, 2013.
- Zona, D., Lipson, D. A., Richards, J. H., Phoenix, G. K., Liljedahl, A. K., Ueyama, M., Sturtevant, C. S. and Oechel, W. C.: Delayed responses of an Arctic ecosystem to an extreme summer: impacts on net ecosystem exchange and vegetation functioning, *Biogeosciences*, 11(20), 5877–5888, doi:10.5194/bg-11-5877-2014, 2014.
